# Supplementary material for: D–D–A dyes with phenothiazine–carbazole/triphenylamine as double donors in photopolymerization under 455 nm and 532 nm laser beams
Source: Royal Society of Chemistry journal article supplement (doi:10.1039/c6py00918b), 2016-01-01
Supplement: c6py00918b1.pdf [file c6py00918b1.pdf]

## D-D-A dyes with phenothiazine-carbazole/triphenylamine as double donors in photopolymerization under 455 nm and 532 nm laser beams

T. F. Zhou,<sup>a</sup> X. Y. Ma,<sup>b</sup> W. X. Han,<sup>b</sup> X. P. Guo,<sup>b</sup> R. Q. Gu,<sup>b</sup> L. J. Yu,<sup>b</sup> J. Li<sup>b</sup>, Y. M. Zhao<sup>c</sup> and Tao Wang<sup>\*a,b</sup>

<sup>a</sup>State Key Laboratory of Chemical Resource Engineering, College of Science, Beijing University of Chemical Technology, Beijing 100029, China

<sup>b</sup>Department of Organic Chemistry, College of Science, Beijing University of Chemical Technology, Beijing 100029, PR China

<sup>c</sup>Department of Chemistry, Memorial University, St. John's, NL, Canada A1B3X7, Phone: (709) 864-8747 Fax: (709) 864-3702 E-Mail: yuming@mun.ca

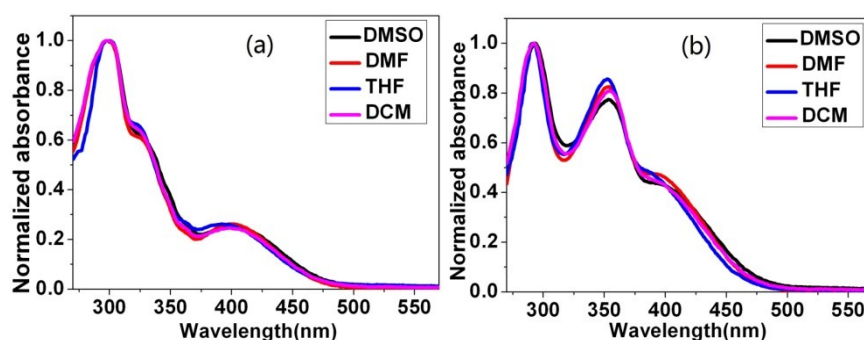

Fig.S1. The Normalized UV-vis absorption spectra of (a) CPC and (b) TPC in different solvents ( $1 \times 10^{-5}$  M).

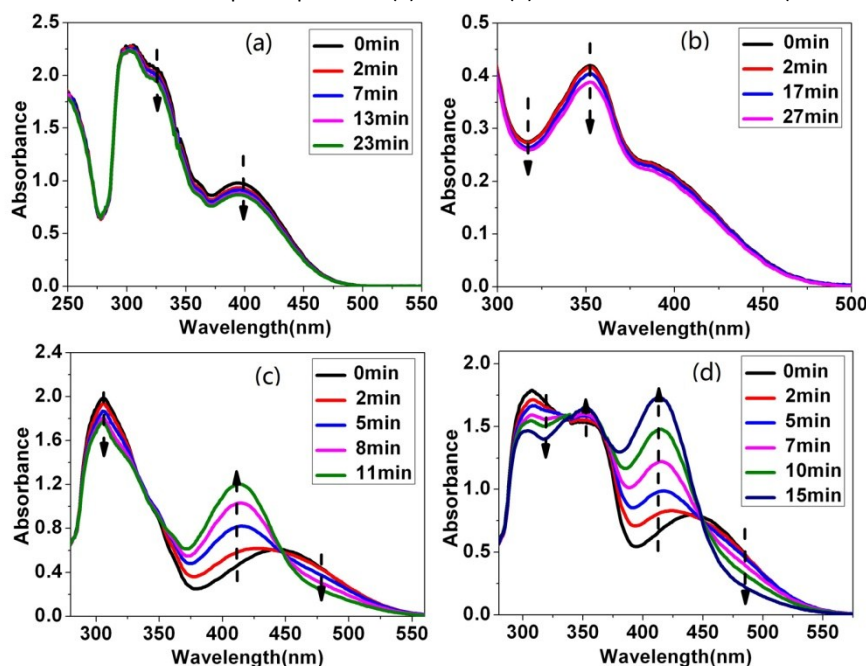

Fig.S2. Absorption of (a) CPC/ONI, (b) TPC/ONI, (c) CPN/ONI and (d) TPN/ONI in THF solution upon the a laser

diode at 532 nm exposure ( $M_{DA} = 5 \times 10^{-6}$  mol/L,  $M_{ONI} = 1 \times 10^{-3}$  mol/L,  $m_{dye}:m_{ONI} = 10:1$ ); UV-vis spectra were recorded at different irradiation times.

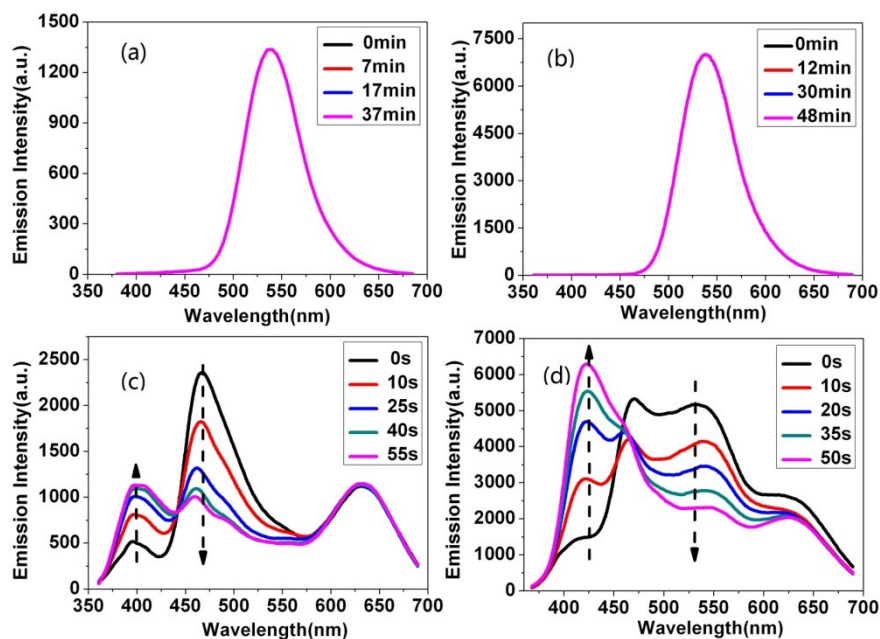

**Fig.S3.** Intensity of (a) CPC/ONI, (b)TPC/ONI, (c)CPN/ONI and (d)TPN/ONI in THF solution upon the a laser diode at 532 nm exposure ( $M_{DA} = 5 \times 10^{-6}$  mol/L,  $M_{ONI} = 1 \times 10^{-3}$  mol/L,  $m_{dye}:m_{ONI} = 10:1$ ); Fluorescence spectra were recorded at different irradiation times.

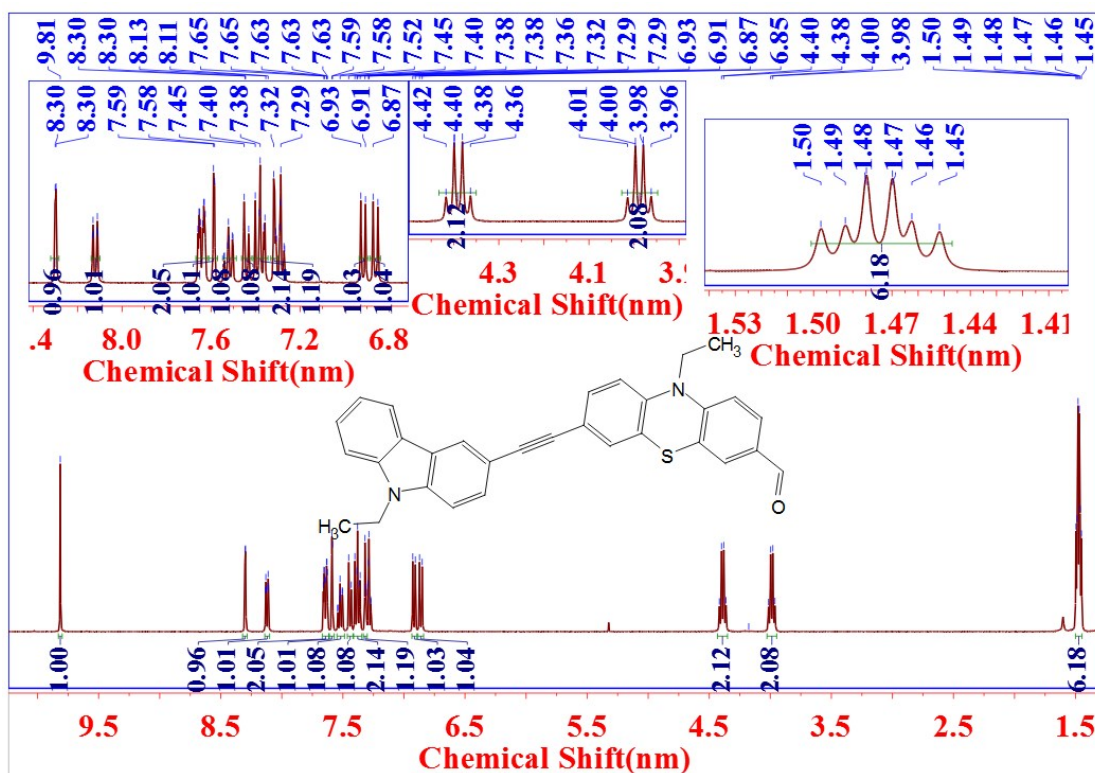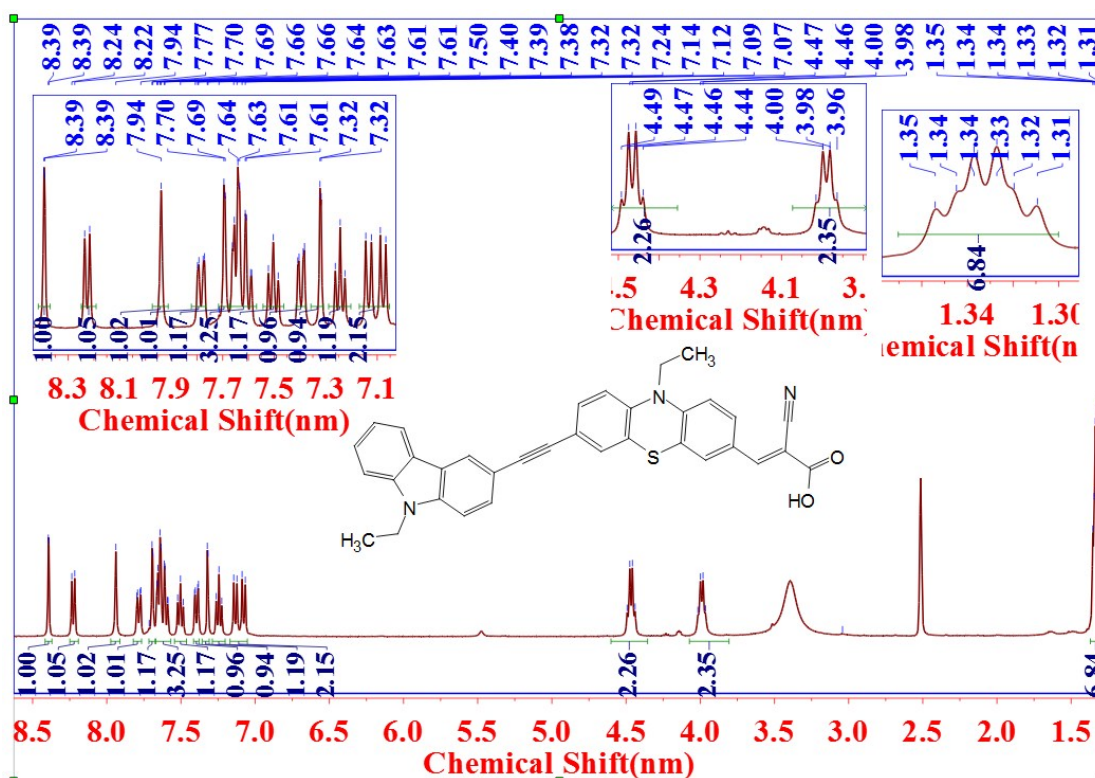

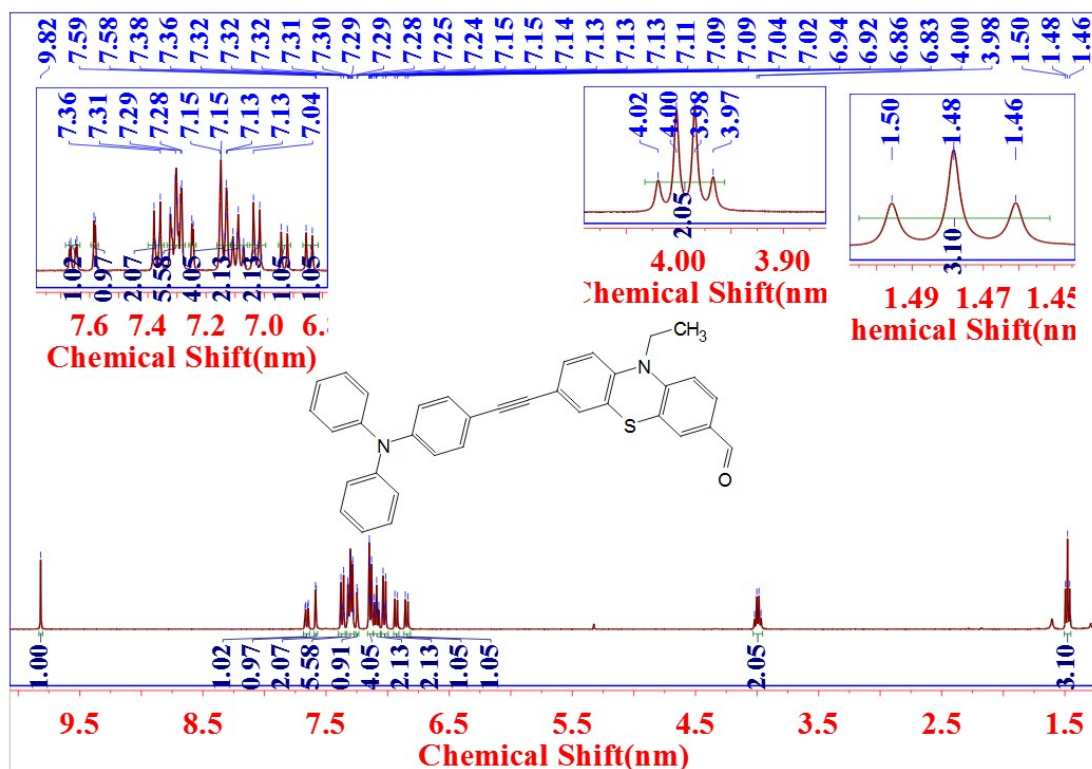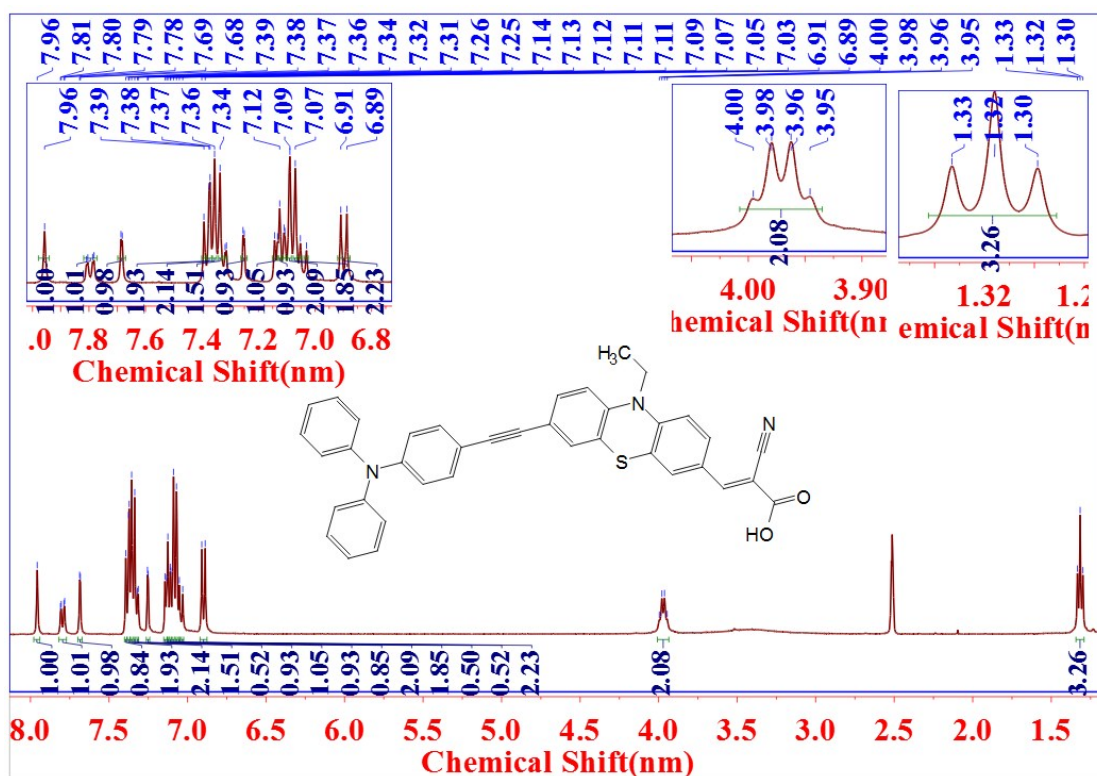

Fig. S4 The  $^1\text{H}$  NMR spectra of four dyes



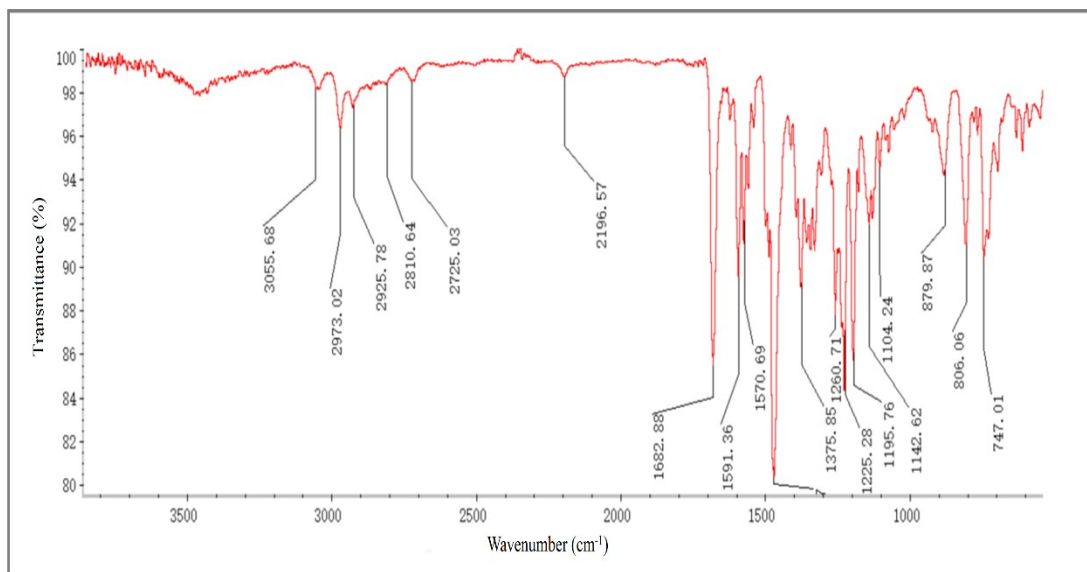

IR of CPC

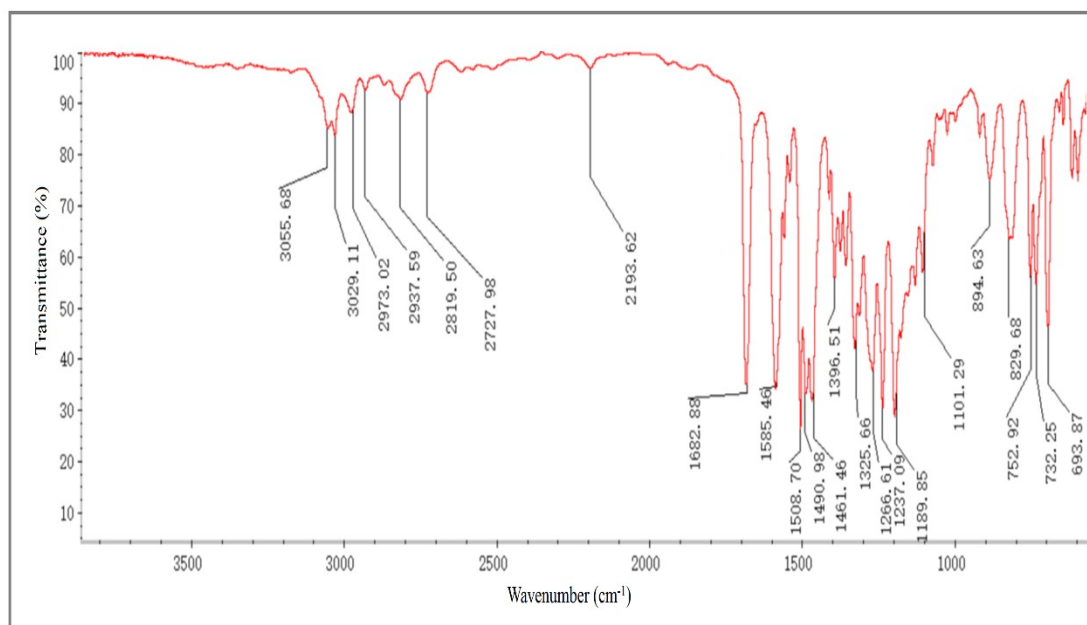

IR of TPC

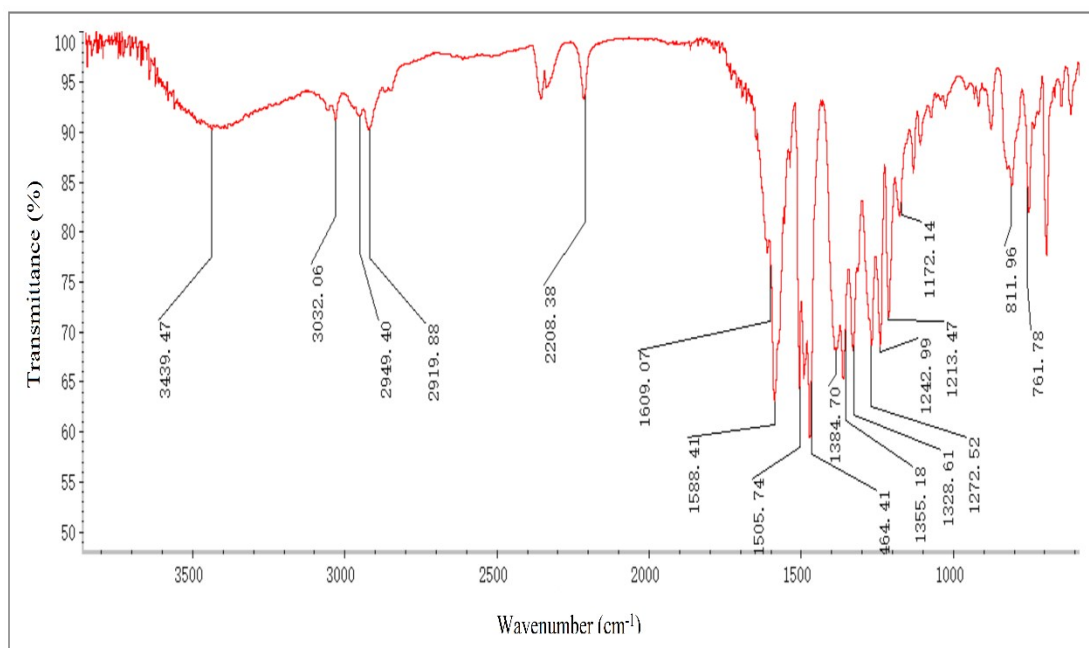

IR of CPN

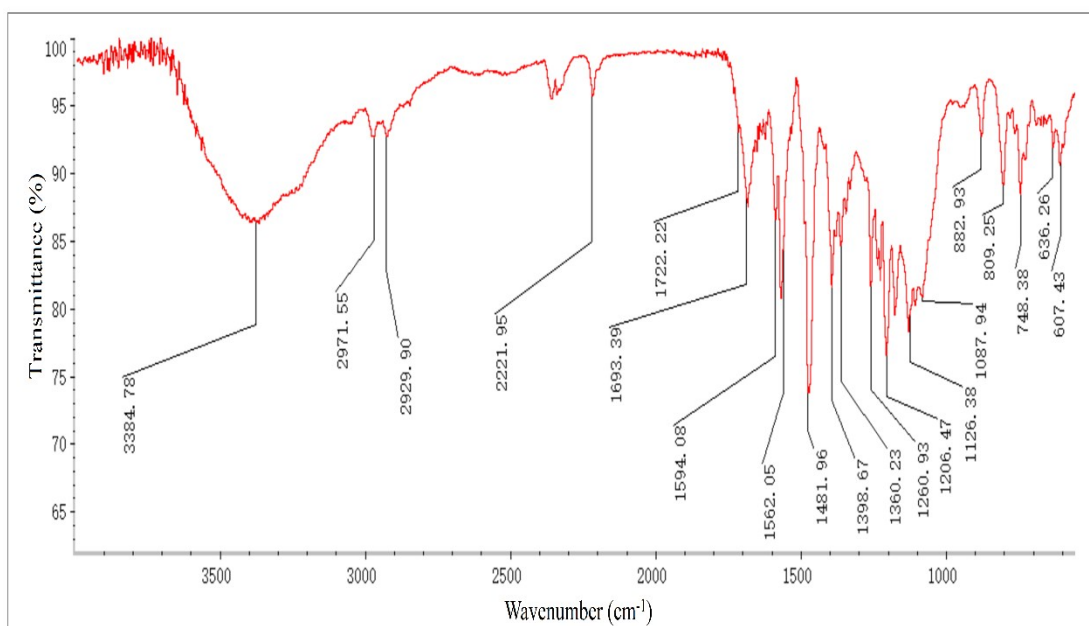

IR of TPN

Fig. S5 The IR spectra of four dyes
